# Supplementary material for: Facile synthesis of hierarchical MnO2 sub-microspheres composed of nanosheets and their application for supercapacitors
Source: Royal Society of Chemistry journal article supplement (doi:10.1039/c4ra07880b), 2014-01-01
Supplement: c4ra07880b1.pdf [file c4ra07880b1.pdf]

## Electronic Supplementary Information (ESI)

### Facile synthesis of hierarchical MnO<sub>2</sub> sub-microspheres composed of nanosheets and its application for supercapacitor

Lifang Lian,<sup>ab</sup> Jie Yang,<sup>ab</sup> Peixun Xiong,<sup>ab</sup> Weifeng Zhang<sup>ab</sup> and Mingdeng Wei<sup>\*ab</sup>

- a) State Key Laboratory of Photocatalysis on Energy and Environment, Fuzhou University, Fuzhou, Fujian 350002, China.  
b) Institute of Advanced Energy Materials, Fuzhou University, Fuzhou, Fujian 350002, China

\*Corresponding author: Mingdeng Wei  
Tel./fax: +86-591-83753180  
E-mail address: wei-mingdeng@fzu.edu.cn

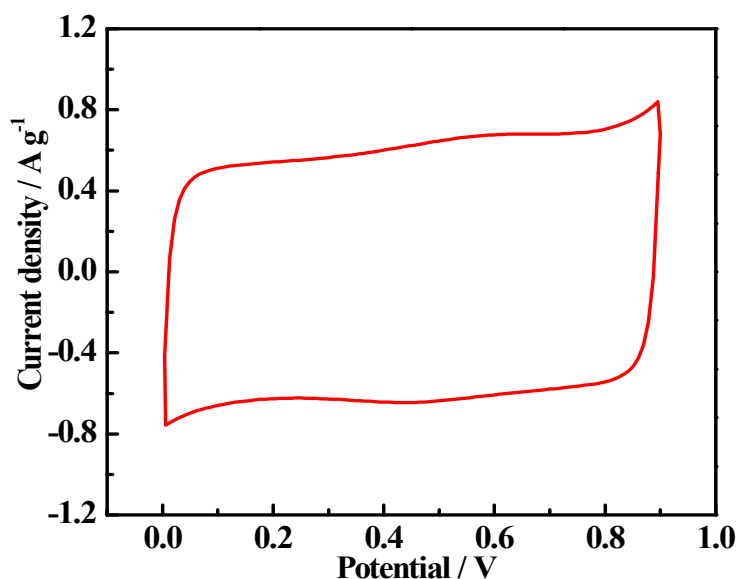

Fig. S1 CV curve of MnO<sub>2</sub> electrode at a current density of 10 mV s<sup>-1</sup>.
